# Supplementary material for: Analytical validation of a highly sensitive point-of-care system for cardiac troponin I determination
Source: publisher site journal article supplement (doi:10.1515/cclm-2019-0801), 2019-10-17
Supplement: Supplementary file 6 [file Supplemental Table 1.docx]

**Supplemental Table 1.** Synopsis of the study protocol.

| **Study item** | **Study details** | | | |
| --- | --- | --- | --- | --- |
| **Sample type** | **No. of measurements** | **Cartridge lot number** | **Remarks** |
| Limit of blank / Limit of detection | 0 calibrator / pooled plasma | 60 / 60 / 20 | 611 | Verification of the limit of detection added |
| In-vitro sample stability | Fresh native whole blood | 90 (5x2x9) | 611 | Stability @ room temperature and +4 °C |
| Linearity (dilution) | Pooled plasma | 90 (3x3x10) | 611 | – |
| Human anti-mouse antibody interference | Native plasma | 56 (14x4) | 611 | EDTA plasma commercially available |
| Imprecision | Pooled plasma | 480  (6x2x2x20) | 1011  1111 | – |
| Sample comparison | Fresh native whole blood  vs. fresh native plasma | 149 x 2 | 611 | Hematocrit measured in paired EDTA samples upon arrival in laboratory.  Both measurements done within 2 h from sample collection |
| Method comparison | Fresh native whole blood vs.  frozen (–80 °C) plasma | 139 x 2 | 611 | Hematocrit measured in paired EDTA samples upon arrival in laboratory.  One sample out of linearity |
| Reference values | Fresh native whole blood | 600 | 611 | Hematocrit measured in paired EDTA samples |
